# Supplementary material for: Palm Foliage as Pathways of Pathogenic Botryosphaeriaceae Fungi and Host of New Lasiodiplodia Species from Mexico
Source: MDPI journal article supplement (doi:10.3390/pathogens10101297), 2021-10-08
Supplement: s1 [file s1]

# Palm Foliage as Pathways Of Pathogenic Botryosphaeriaceae Fungi And Host of New *Lasiodiplodia* Species from Mexico

Clovis Douanla-Meli<sup>1\*</sup>, Andreas Scharnhorst<sup>2</sup>

<sup>1</sup> Julius Kühn Institute (JKI) – Federal Research Centre for Cultivated Plants, Institute for National and International Plant Health, Messeweg 11-12, 38104 Braunschweig, Germany (<https://orcid.org/0000-0001-7182-5905>); [clovis.douanla-meli@julius-kuehn.de](mailto:clovis.douanla-meli@julius-kuehn.de)

<sup>2</sup> Dezernat 51.4, Regierungspräsidium Gießen Pflanzenschutzdienst Hessen, Flughafen Frankfurt; [e-mail@e-mail.com](mailto:e-mail@e-mail.com)

\* Correspondence: [clovis.douanla-meli@julius-kuehn.de](mailto:clovis.douanla-meli@julius-kuehn.de); Tel.: +49 5312994370, CDM)

Supplementary files

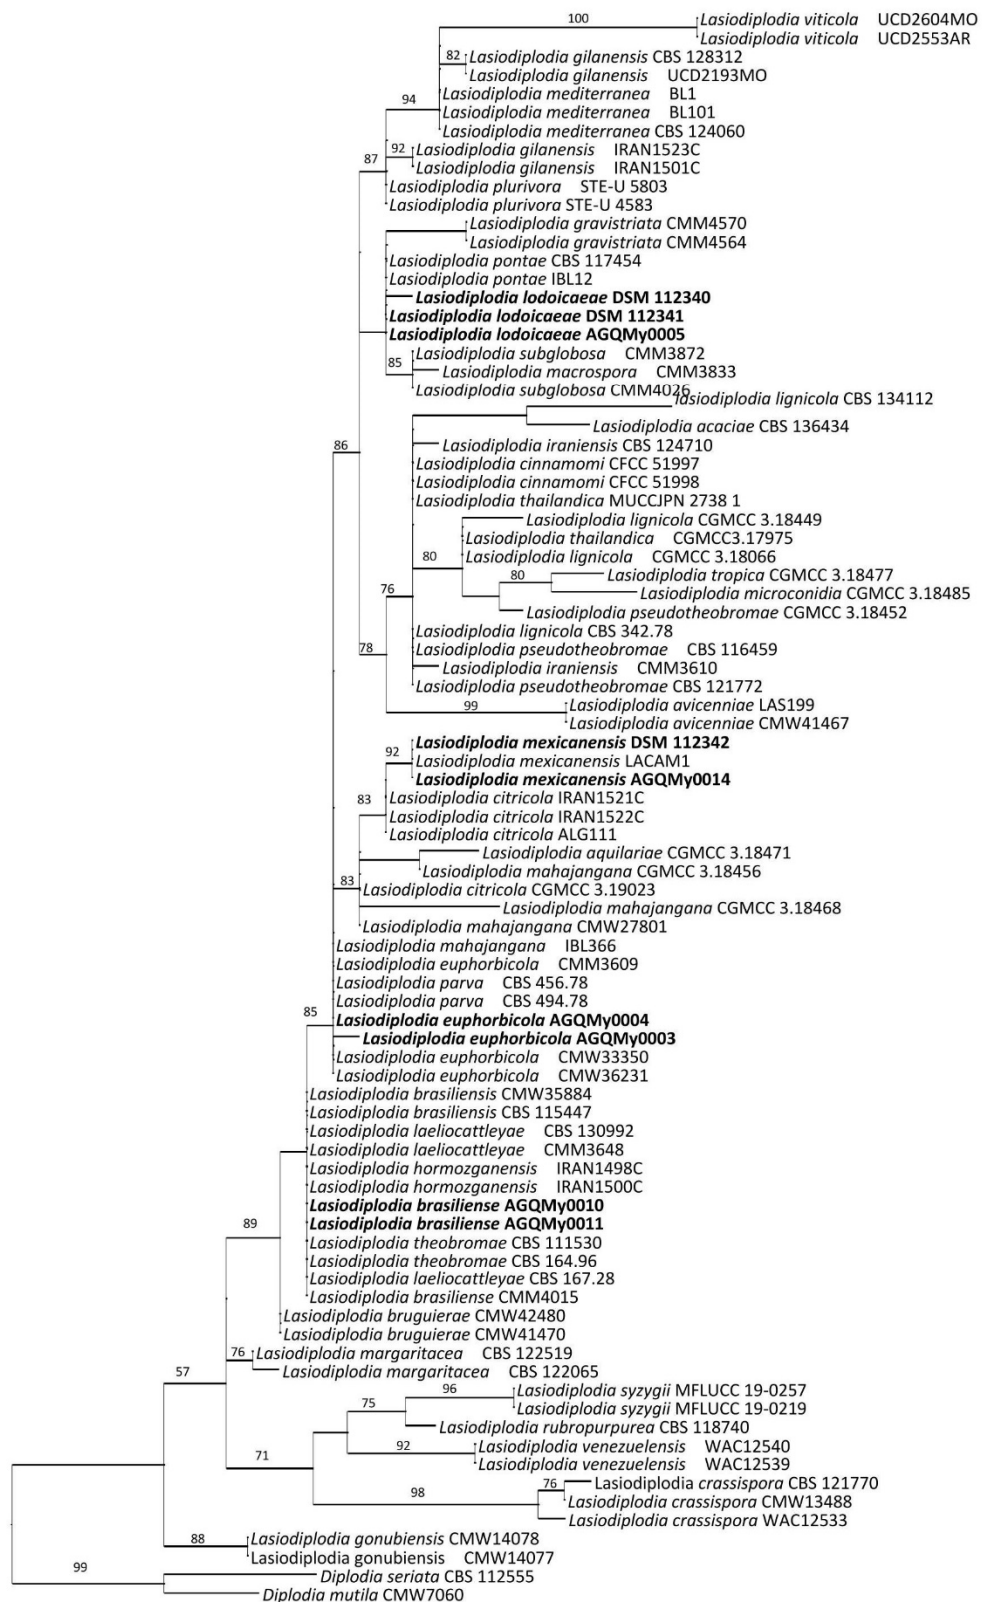

**Figure S1.** RAxML tree of *Lasiodiplodia* based on ITS dataset showing the phylogenetic placement of isolates from palm foliage from Mexico. Maximum likelihood bootstrap values (MLB > 60 %) displayed at the nodes. The tree is rooted to *Diplodia mutila* (CMW7060) and *Diplodia seriata* (CBS 112555). Isolates from palm foliage are in bold characters.

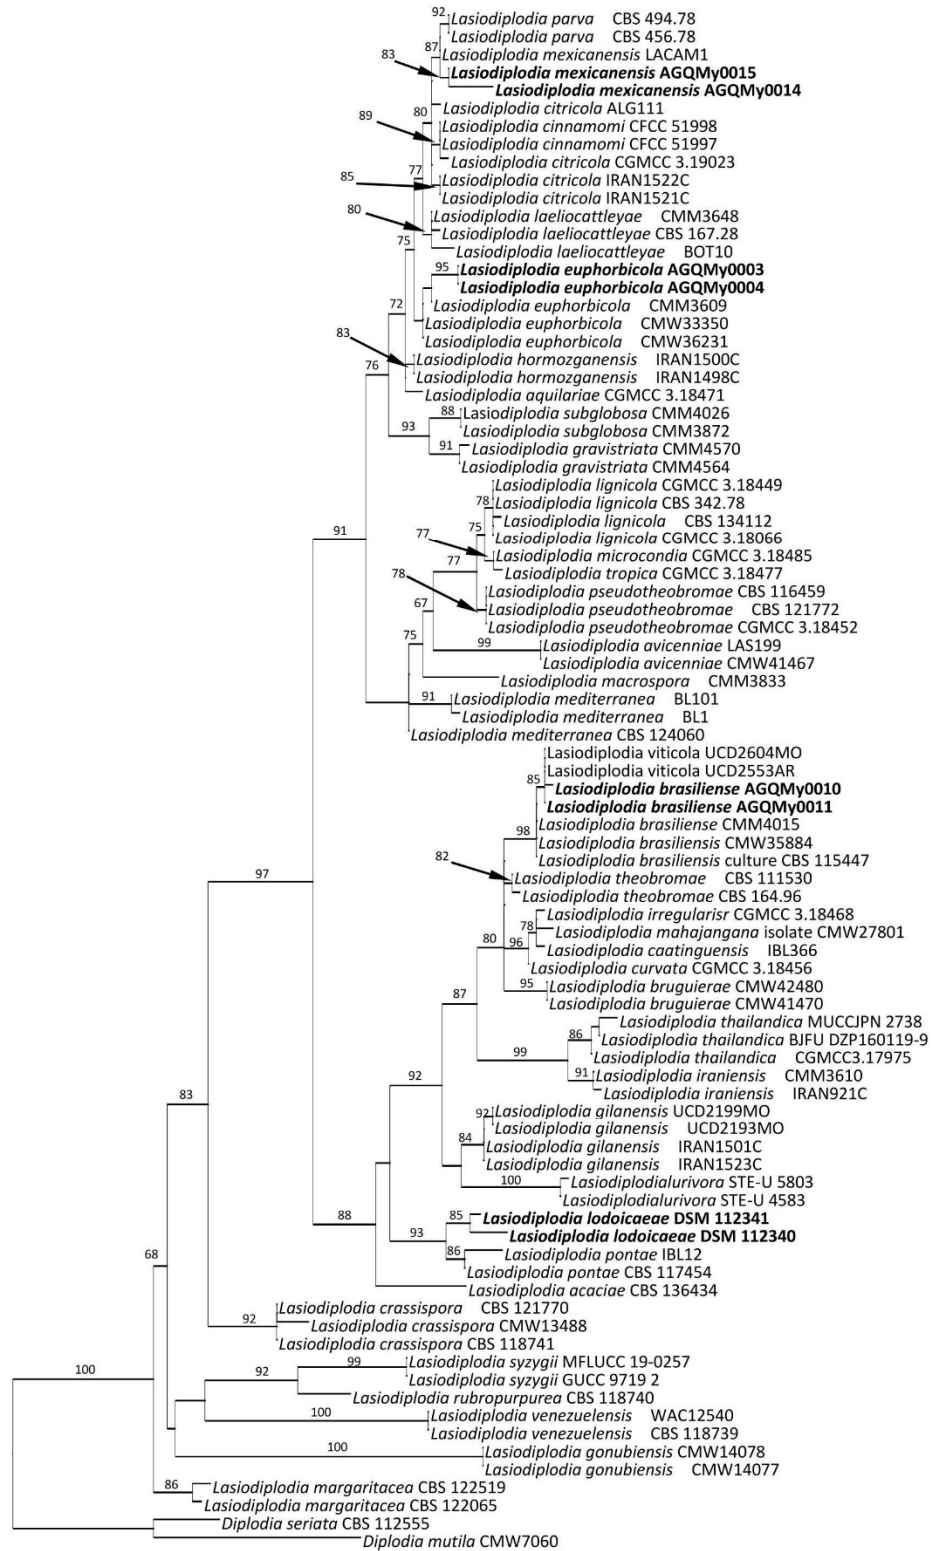

**Figure S2.** RAxML tree of *Lasiodiplodia* based on *TEF-1α* dataset showing the phylogenetic placement of isolates from palm foliage from Mexico. Maximum likelihood bootstrap values (MLB > 60 %) displayed at the nodes. The tree is rooted to *Diplodia mutila* (CMW7060) and *Diplodia seriata* (CBS 112555). Isolates from palm foliage are in bold characters.

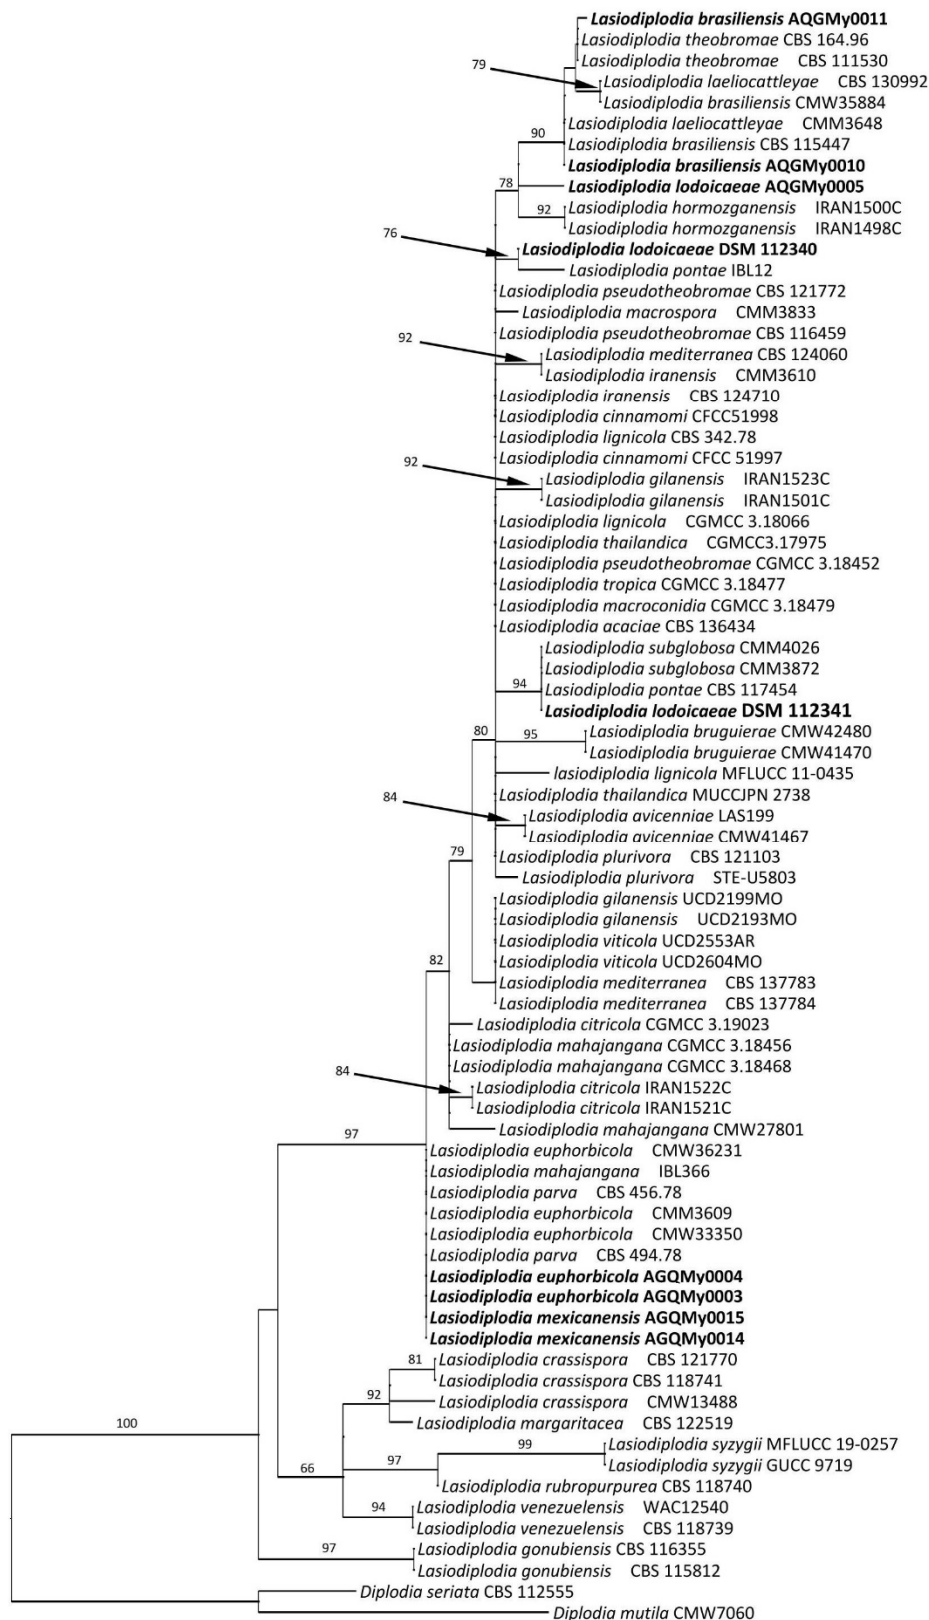

**Figure S3.** RAxML tree of *Lasiodiplodia* based on *TUB2* dataset showing the phylogenetic placement of isolates from palm foliage from Mexico. Maximum likelihood bootstrap values (MLB > 60 %) displayed at the nodes. The tree is rooted to *Diplodia mutila* (CMW7060) and *Diplodia seriata* (CBS 112555). Isolates from palm foliage are in bold characters.

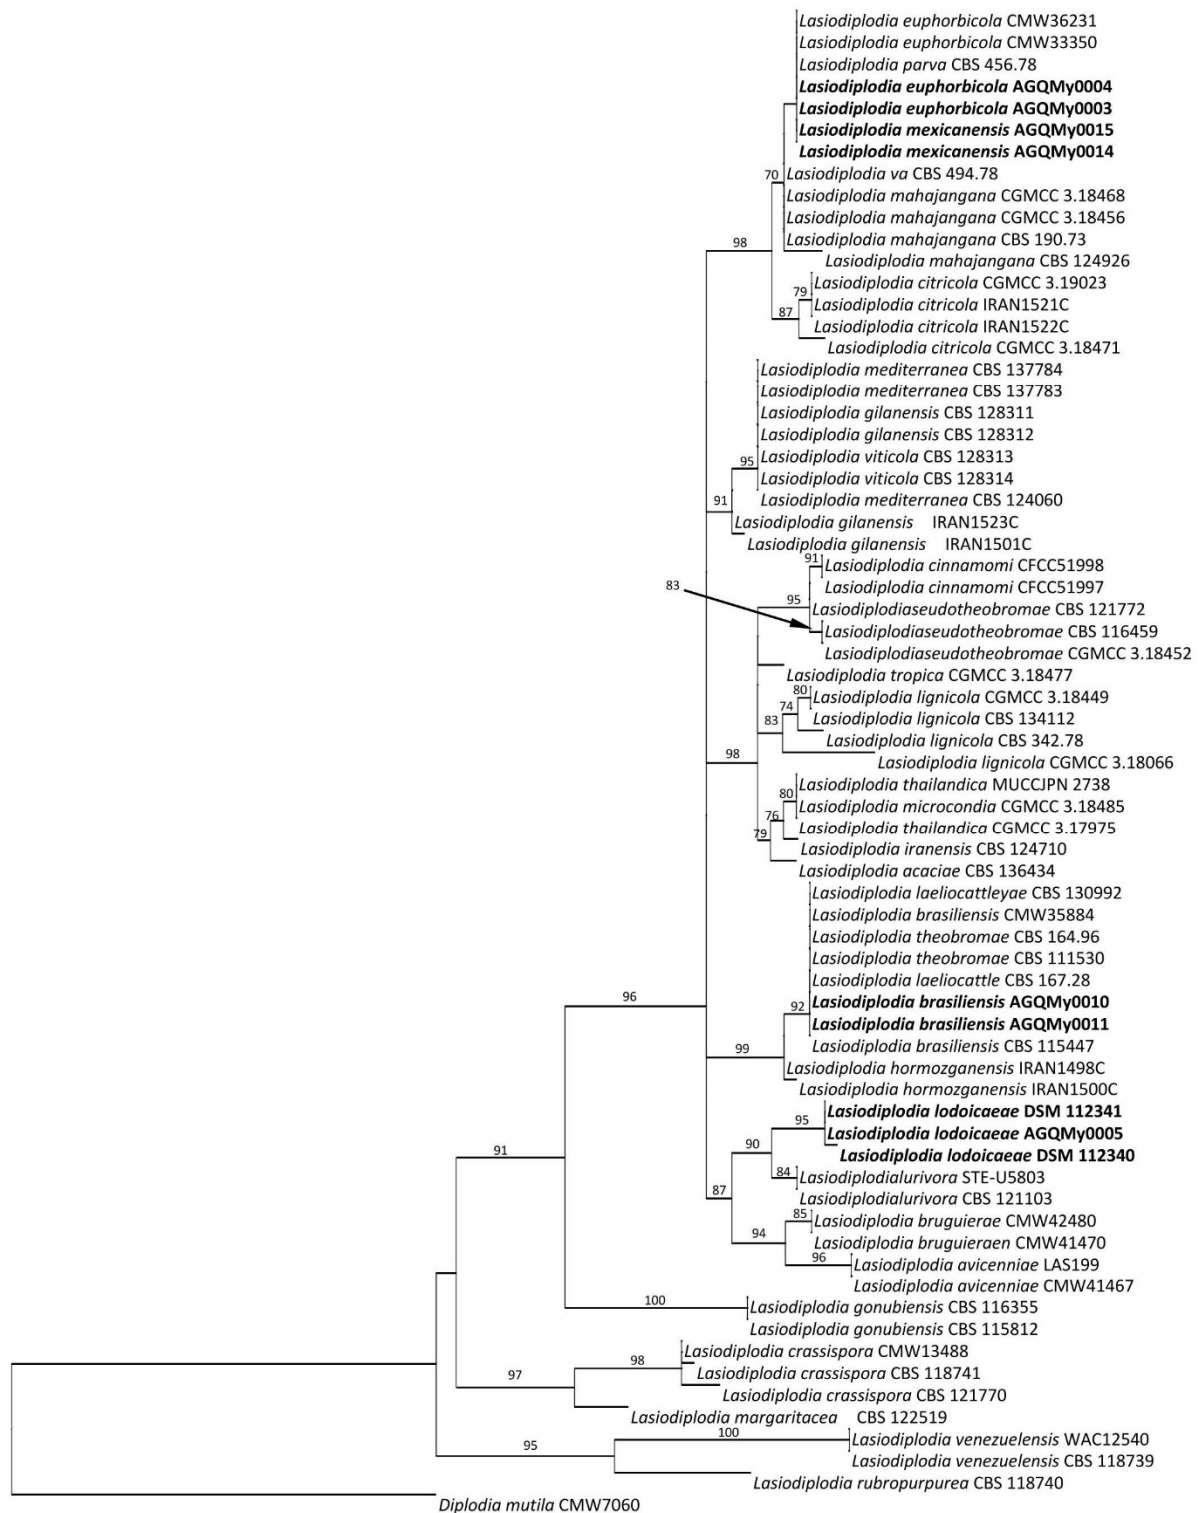

**Figure S4.** RAxML tree of *Lasiodiplodia* based on RPB2 dataset showing the phylogenetic placement of isolates from palm foliage from Mexico. Maximum likelihood bootstrap values (MLB > 60 %) displayed at the nodes. The tree is rooted to *Diplodia mutila* (CMW7060) and *Diplodia seriata* (CBS 112555). Isolates from palm foliage are in bold characters.



**Table S1.** Culture accession numbers, location, host and GenBank accession numbers of Botryosphaeriaceae isolates included in this study. The newly generated sequences are in bold.

| Species                                            | Isolate code         | Location         | Host                          | Genbank accession number |                 |                 |                 |
|----------------------------------------------------|----------------------|------------------|-------------------------------|--------------------------|-----------------|-----------------|-----------------|
|                                                    |                      |                  |                               | ITS                      | TEF-1 $\alpha$  | TUB2            | RPB2            |
| <i>Diplodia mutila</i> <sup>†</sup>                | CMW 7060             | Netherlands      | <i>Fraxinus excelsior</i>     | AY236955                 | AY236904        | AY236933        | EU339574        |
| <i>D. seriata</i> <sup>†</sup>                     | CBS 112555           | Portugal         | <i>Vitis vinifera</i>         | AY259094                 | AY573220        | DQ458856        | N/A             |
| <i>Endomelanconiopsis endophytica</i> <sup>†</sup> | CBS 120397           | Panama           | <i>Theobroma cacao</i>        | NR_156272                | KF766164        | N/A             | N/A             |
| <i>E. endophytica</i>                              | <b>AGQMMy0007</b>    | <b>Mexico</b>    | <i>Lodoicea maldivica</i>     | <b>MW274143</b>          | <b>MW604226</b> | N/A             | N/A             |
| <i>E. endophytica</i>                              | <b>AGQMMy0008</b>    | <b>Mexico</b>    | <i>Lo. maldivica</i>          | <b>MW274149</b>          | <b>MW604232</b> | N/A             | N/A             |
| <i>E. endophytica</i>                              | <b>AGQMMy0009</b>    | <b>Mexico</b>    | <i>Dypsis lutescens</i>       | <b>MW274142</b>          | <b>MW604231</b> | N/A             | N/A             |
| <i>E. endophytica</i>                              | <b>AGQMMy0012</b>    | <b>Mexico</b>    | <i>D. lutescens</i>           | <b>MW274141</b>          | <b>MW604225</b> | N/A             | N/A             |
| <i>E. endophytica</i>                              | CBS 122542           | Panama           | <i>Heisteria concinna</i>     | EU683669                 | EU683650        | N/A             | N/A             |
| <i>E. endophytica</i>                              | CBS 122547           | Panama           | <i>T. cacao</i>               | EU683666                 | EU683647        | N/A             | N/A             |
| <i>E. endophytica</i>                              | CBS 122552           | Panama           | <i>H. concinna</i>            | EU683667                 | EU683648        | N/A             | N/A             |
| <i>E. endophytica</i>                              | CBS 122551           | Panama           | <i>T. cacao</i>               | EU683665                 | EU683646        | N/A             | N/A             |
| <i>E. endophytica</i>                              | 9188                 | Panama           | <i>H. concinna</i>            | EU683668                 | EU683649        | N/A             | N/A             |
| <i>E. endophytica</i>                              | CBS 122550           | Panama           | <i>T. cacao</i>               | EU683664                 | EU683645        | N/A             | N/A             |
| <i>E. endophytica</i>                              | CMW28551             | Cameroon         | <i>Terminalia superba</i>     | GQ469967                 | GQ469907        | N/A             | N/A             |
| <i>E. endophytica</i>                              | CMW28552             | Cameroon         | <i>Te. superba</i>            | GQ469968                 | GQ469908        | N/A             | N/A             |
| <i>E. endophytica</i>                              | CMW28618             | Cameroon         | <i>Te. ivorensis</i>          | GQ469966                 | GQ469906        | N/A             | N/A             |
| <i>E. microspora</i>                               | CBS 353.97           | Papua New Guinea | Soil                          | EU683655                 | EU683636        | N/A             | N/A             |
| <i>E. microspora</i>                               | 580809               | China            | plant root                    | MK371761                 | N/A             | N/A             | N/A             |
| <i>E. microspora</i>                               | PP108                | Peru             | <i>Hevea brasiliensis</i>     | FJ884091                 | N/A             | N/A             | N/A             |
| <i>E. microspora</i>                               | PP73 18S             | Peru             | <i>H. brasiliensis</i>        | FJ884092                 | N/A             | N/A             | N/A             |
| <i>E. microspora</i> <sup>†</sup>                  | CBS 353.97           | Papua New Guinea | Soil                          | EU683655                 | EU683636        | N/A             | N/A             |
| <i>E. freycinetiae</i> <sup>†</sup>                | MFLUCC 17-0547       | Thailand         | Pandanaceae                   | MG646955                 | MG646983        | N/A             | N/A             |
| <i>E. freycinetiae</i>                             | BSNB-0528            | French Guiana    | <i>Astrocaryum sciophilum</i> | MK650407                 | N/A             | N/A             | N/A             |
| <i>E. freycinetiae</i>                             | BSNB-0587            | French Guiana    | <i>A. sciophilum</i>          | MK650386                 | N/A             | N/A             | N/A             |
| <i>E. freycinetiae</i>                             | BSNB-0681            | French Guiana    | <i>A. sciophilum</i>          | MK650386                 | N/A             | N/A             | N/A             |
| <i>E. freycinetiae</i>                             | BSNB-0547            | French Guiana    | <i>A. sciophilum</i>          | MK650363                 | N/A             | N/A             | N/A             |
| <i>Lasioidiplodia</i> sp.                          | LACAM1               | Peru             | <i>Mangifera indica</i>       | KU507469                 | KU507436        | N/A             | N/A             |
| <i>Lasioidiplodia acaciae</i>                      | CBS 136434           | Indonesia        | <i>Acacia</i> sp., leaf spot  | MT587421                 | MT592133        | MT592613        | MT592307        |
| <i>L. avicenniae</i> <sup>†</sup>                  | 139670/CMW41467      | South Africa     | <i>Avicennia marina</i>       | KP860835                 | KP860680        | KP860758        | KU587878        |
| <i>L. avicenniae</i>                               | LAS199               | South Africa     | <i>A. marina</i>              | KU587957                 | KU587947        | KU587868        | KU587880        |
| <i>L. brasiliense</i> <sup>†</sup>                 | CMM 4015             | Brazil           | <i>M. indica</i>              | JX464063                 | JX464049        | N/A             | N/A             |
| <i>L. brasiliense</i>                              | CMW 35884            | Laos             | <i>A. crassna</i>             | KU887094                 | KU886972        | KU887466        | KU696345        |
| <i>L. brasiliense</i>                              | CBS 115447           | Hong Kong        | <i>Psychotria tutcheri</i>    | MT587422                 | MT592134        | MT592614        | MT592308        |
| <i>L. brasiliense</i>                              | <b>AGQMMy0010</b>    | <b>Mexico</b>    | <i>Lo. maldivica</i>          | <b>MW274144</b>          | <b>MW604227</b> | <b>MW604237</b> | <b>MW604216</b> |
| <i>L. brasiliense</i>                              | <b>AGQMMy0011</b>    | <b>Mexico</b>    | <i>Lo. maldivica</i>          | <b>MW274145</b>          | <b>MW604228</b> | <b>MW604238</b> | <b>MW604217</b> |
| <i>L. bruguierae</i> <sup>†</sup>                  | CBS 139669/CMW41470  | South Africa     | <i>Bruguiera gymnorrhiza</i>  | KP860834                 | KP860679        | KP860757        | KU587875        |
| <i>L. bruguierae</i>                               | CMW42480             | South Africa     | <i>B. gymnorrhiza</i>         | KP860832                 | KP860677        | KP860755        | KU587876        |
| <i>L. cinnamomi</i> <sup>†</sup>                   | CFCC 51997           | China            | <i>Cinnamomum camphor</i>     | MG866028                 | MH236799        | MH236797        | N/A             |
| <i>L. cinnamomi</i>                                | CFCC 51998           | China            | <i>C. camphora</i>            | MG866029                 | MH236800        | MH236798        | N/A             |
| <i>L. citricola</i> <sup>†</sup>                   | CBS 124707/IRAN1522C | Iran             | <i>Citrus</i> sp.             | GU945354                 | GU945340        | KU887505        | KU696351        |
| <i>L. citricola</i>                                | IRAN1521C            | Iran             | <i>Citrus</i> sp.             | GU945353                 | GU945339        | KU887504        | KU696350        |

|                                        |                            |              |                                 |          |          |          |              |
|----------------------------------------|----------------------------|--------------|---------------------------------|----------|----------|----------|--------------|
| <i>L. crassispora</i> <sup>T</sup>     | CBS<br>118741/WAC12<br>533 | Australia    | <i>Santalum album</i>           | DQ103550 | EU673303 | KU887506 | KU696353     |
| <i>L. crassispora</i>                  | CMW 13488                  | Venezuela    | <i>Eucalyptus<br/>urophylla</i> | DQ103552 | DQ103559 | KU887507 | KU696352     |
| <i>L. crassispora</i>                  | CBS 121770                 | Namibia      | <i>Acacia mellifera</i>         | EU101307 | EU101352 | KU887527 | KU696378     |
| <i>L. euphorbiicola</i> <sup>T</sup>   | CMM 3609                   | Brazil       | <i>J. cuscas</i>                | KF234543 | KF226689 | KF254926 | N/A          |
| <i>L. euphorbiicola</i>                | CMW 33350                  | Botswana     | <i>Adansonia digitata</i>       | KU887149 | KU887026 | KU887455 | KU696346     |
| <i>L. euphorbiicola</i>                | CMW 36231                  | Zimbabwe     | <i>A. digitata</i>              | KU887187 | KU887063 | KU887494 | KU696347     |
| <i>L. euphorbiicola</i>                | AGQMy0003                  | Mexico       | <i>Chamaedorea<br/>elegans</i>  | MW274139 | MW604223 | MW604235 | MW60421<br>4 |
| <i>L. euphorbiicola</i>                | AGQMy0004                  | Mexico       | <i>Ch. elegans</i>              | MW274140 | MW604224 | MW604236 | MW60421<br>5 |
| <i>L. gilanensis</i> <sup>T</sup>      | CBS 124704<br>/IRAN1523C   | Iran         | Unknown                         | GU945351 | GU945342 | KU887511 | KU696357     |
| <i>L. gilanensis</i>                   | CBS 124705                 | Iran         | Unknown                         | GU945352 | GU945341 | KU887510 | KU696356     |
| <i>L. gonubiensis</i> <sup>T</sup>     | CBS 115812<br>/CMW14077    | South Africa | <i>Syzygium cordatum</i>        | AY639595 | DQ103566 | DQ458860 | KU696359     |
| <i>L. gravistriata</i> <sup>T</sup>    | CMM 4564                   | Brazil       | <i>Anacardium humile</i>        | KT250949 | KT250950 | N/A      | N/A          |
| <i>L. gravistriata</i>                 | CMM 4570                   | Brazil       | <i>A. humile</i>                | KT250948 | KT266814 | N/A      | N/A          |
| <i>L. hormozganensis</i> <sup>T</sup>  | IRAN1500C                  | Iran         | <i>Ole asp.</i>                 | GU945355 | GU945343 | KU887515 | KU696361     |
| <i>L. hormozganensis</i>               | IRAN 1498C                 | Iran         | <i>M. indica</i>                | GU945356 | GU945344 | KU887514 | KU696360     |
| <i>L. iraniensis</i> <sup>T</sup>      | CBS 124710/<br>IRAN921     | Iran         | <i>M. indica</i>                | GU945346 | GU945334 | KU887516 | KU696363     |
| <i>L. iraniensis</i>                   | CMM 3610                   | Brazil       | <i>J. curcas</i>                | KF234544 | KF226690 | KF254927 | N/A          |
| <i>L. laeliocattleyae</i> <sup>T</sup> | CBS<br>130992/BOT10        | Egypt        | <i>M. indica</i>                | JN814397 | JN814424 | KU887508 | KU696354     |
| <i>L. laeliocattleyae</i>              | CMM3648                    | Brazil       | <i>Jatropha curcas</i>          | KF234549 | KF226705 | KF254933 | N/A          |
| <i>L. laeliocattleyae</i>              | CBS 167.28                 | Italy        | <i>Laelio cattleya</i>          | MT587425 | MT592136 | MT592618 | MT592313     |
| <i>L. lignicola</i> <sup>T</sup>       | CBS 134112                 | Thailand     | dead wood                       | JX646797 | KU887003 | JX646845 | KU696364     |
| <i>L. lignicola</i>                    | CGMCC<br>3.18449           | Laos         | <i>A. crassna</i>               | KY783466 | KY848619 | N/A      | KY848586     |
| <i>L. lignicola</i>                    | CBS 342.78                 | Germany      | <i>Sterculia oblonga</i>        | KX464140 | KX464634 | KX464908 | KX463989     |
| <i>L. loidaceae</i> <sup>T</sup>       | DSM 112340                 | Mexico       | <i>Lo. maldivica</i>            | MW274148 | MW604230 | MW604240 | MW60421<br>9 |
| <i>L. loidaceae</i>                    | AGQMy0005                  | Mexico       | <i>Lo. maldivica</i>            | MW274147 | N/A      | MW604241 | MW60422<br>0 |
| <i>L. loidaceae</i>                    | DSM 112341                 | Mexico       | <i>Lo. maldivica</i>            | MW274146 | MW604229 | MW604239 | MW60421<br>8 |
| <i>L. macroconidia</i> <sup>T</sup>    | CGMCC<br>3.18479           | Laos         | <i>A. crassna</i>               | KY783438 | KY848597 | KY848530 | KY848558     |
| <i>L. macrospora</i> <sup>T</sup>      | CMM 3833                   | Brazil       | <i>J. curcas</i>                | KF234557 | KF226718 | KF254941 | N/A          |
| <i>L. mahajangana</i> <sup>T</sup>     | CBS<br>124927/CMW27<br>818 | Madagascar   | <i>Te. catappa</i>              | FJ900595 | FJ900641 | FJ900630 | KU696366     |
| <i>L. mahajangana</i>                  | CBS 190.73                 | Tanzania     | <i>Persea americana</i>         | EF622068 | EF622048 | MT592616 | MT592311     |
| <i>L. mahajangana</i>                  | CGMCC 3.18456              | Laos         | <i>A. crassna</i>               | KY783437 | KY848596 | KY848529 | KY848557     |
| <i>L. mahajangana</i>                  | CGMCC<br>3.18477           | Laos         | <i>A. crassna</i>               | KY783454 | KY848616 | KY848540 | KY848574     |
| <i>L. margaritacea</i> <sup>T</sup>    | CBS 122519                 | Australia    | <i>Adansonia gibbosa</i>        | EU144050 | EU144065 | KU887520 | KU696367     |
| <i>L. margaritacea</i>                 | CBS 122065                 | Australia    | <i>A. gibbosa</i>               | EU144051 | EU144066 | N/A      | N/A          |
| <i>L. mediterranea</i> <sup>T</sup>    | CBS 137783 /<br>BL1        | Italy        | <i>Quercus ilex</i>             | KJ638312 | KJ638331 | KU887521 | KU696368     |
| <i>L. mediterranea</i>                 | CBS 137784                 | Italy        | <i>Quercus ilex</i>             | KJ638311 | KJ638330 | KU887522 | KU696369     |
| <i>L. mediterranea</i>                 | CBS 124060                 | Italy        | <i>V. vinifera</i>              | KX464148 | KX464642 | KX464917 | KX463994     |
| <i>L. mexicanense</i> <sup>T</sup>     | DSM 112342                 | Mexico       | <i>Ch. seifrizii</i>            | MW274151 | MW604234 | MW604243 | MW60422<br>2 |
| <i>L. mexicanense</i>                  | AGQMy0015                  | Mexico       | <i>Ch. seifrizii</i>            | MW274150 | MW604233 | MW604242 | MW60422<br>1 |

|                                                    |                          |              |                                        |           |          |                 |                 |
|----------------------------------------------------|--------------------------|--------------|----------------------------------------|-----------|----------|-----------------|-----------------|
| <i>L. mexicanense</i>                              | LACAM1                   | Peru         | <i>M. indica</i>                       | KU507469  | KU507436 | N/A             | N/A             |
| <i>L. microcondia</i> <sup>T</sup>                 | CGMCC<br>3.18485         | China        | <i>A. crassna</i>                      | KY783441  | KY848614 | N/A             | KY848561        |
| <i>L. parva</i> <sup>T</sup>                       | CBS 456.78               | Colombia     | cassava field soil                     | EF622083  | EF622063 | KU887523        | KU696372        |
| <i>L. parva</i>                                    | CBS 494.78               | Colombia     | cassava field soil                     | EF622084  | EF622064 | EU673114        | KU696373        |
| <i>L. plurivora</i> <sup>T</sup>                   | STE-U 5803               | South Africa | <i>Prunus salicina</i>                 | EF445362  | EF445395 | KP872421        | KP872479        |
| <i>L. plurivora</i>                                | STE-U 4583               | South Africa | <i>Vitis vinifera</i>                  | AY343482  | EF445396 | KU887525        | KU696375        |
| <i>L. pontae</i> <sup>T</sup>                      | CMM 1277                 | Brazil       | <i>S. purpurea</i>                     | KT151794  | KT151791 | KT151797        | N/A             |
| <i>L. pontae</i>                                   | CBS 117454               | Venezuela    | <i>E. urophylla</i>                    | MT587432  | MT592144 | MT592626        | N/A             |
| <i>L. pseudotheobromae</i> <sup>T</sup>            | CBS 116459               | Costa Rica   | <i>Gmelina arborea</i>                 | EF622077  | EF622057 | EU673111        | KU696376        |
| <i>L. pseudotheobromae</i>                         | CGMCC<br>3.18452         | China        | <i>A. crassna</i>                      | KY783467  | KY848620 | KY848549        | KY848587        |
| <i>L. pseudotheobromae</i>                         | CBS 121772               | Namibia      | <i>Acacia mellifera</i>                | EU101310  | EU101355 | <b>MT592627</b> | <b>MT592323</b> |
| <i>L. rubropurpurea</i> <sup>T</sup>               | CBS 118740               | Australia    | <i>Eucalyptus grandis</i>              | DQ103553  | EU673304 | EU673136        | KU696380        |
| <i>L. rubropurpurea</i>                            | WAC 12536 =<br>CMW 15207 | Australia    | <i>Eucalyptus grandis</i>              | DQ103554  | DQ103572 | KU887530        | KU696381        |
| <i>L. subglobosa</i> <sup>T</sup>                  | CMM 3872                 | Brazil       | <i>J. curcas</i>                       | KF234558  | KF226721 | KF254942        | N/A             |
| <i>L. subglobosa</i>                               | CMM 4046                 | Brazil       | <i>J. curcas</i>                       | KF234560  | KF226723 | KF254944        | N/A             |
| <i>L. syzygii</i> <sup>T</sup>                     | MFLUCC 19-<br>0219.1     | Thailand     | <i>Sy. samarangense</i>                | MT990531  | MW016943 | MW014331        | N/A             |
| <i>L. syzygii</i>                                  | GUCC 9719.2              | Thailand     | <i>Sy. samarangense</i>                | MW081991  | MW087101 | MW087104        | N/A             |
| <i>L. thailandica</i> <sup>T</sup>                 | CGMCC<br>3.18384         | China        | <i>Albizia chinensis</i>               | KY767663  | KY751304 | KY751301        | N/A             |
| <i>L. thailandica</i>                              | CGMCC<br>3.17975         | China        | <i>Acacia confusa</i>                  | KX499879  | KX499917 | KX499992        | KX499955        |
| <i>L. thailandica</i>                              | BJFU<br>DZP160119-9      | China        | <i>Podocarpus<br/>macrophyllus</i>     | KY676788  | KY751303 | KY676794        | N/A             |
| <i>L. theobromae</i> <sup>T</sup>                  | CBS 164.96               | New Guinea   | Fruit on coral reef<br>coast           | AY640255  | AY640258 | KU887532        | KU696383        |
| <i>L. theobromae</i>                               | CBS 111530               | Unknown      | Unknown                                | EF622074  | EF622054 | KU887531        | KU696382        |
| <i>L. venezuelensis</i> <sup>T</sup>               | WAC12539                 | Venezuela    | <i>Acacia mangium</i>                  | DQ103547  | EU673305 | KU887533        | KP872490        |
| <i>L. venezuelensis</i>                            | WAC 12540                | Venezuela    | <i>A. mangium</i>                      | DQ103548  | DQ103569 | KU887534        | KP872491        |
| <i>L. viticola</i> <sup>T</sup>                    | UCD2604MO                | USA          | <i>V. vinifera</i>                     | HQ288228  | HQ288270 | HQ288307        | KU696386        |
| <i>L. viticola</i>                                 | UCD2553AR                | USA          | <i>V. vinifera</i>                     | HQ288227  | HQ288269 | HQ288306        | KU696385        |
| <i>Phyllosticta<br/>parthenocissi</i> <sup>T</sup> | CBS 111645 <sup>T</sup>  | USA          | <i>Parthenocissus<br/>quinquefolia</i> | NR_147322 | JN692530 | N/A             | N/A             |

<sup>T</sup> Ex-type strains, N/A: not available.
